# Supplementary material for: Fat and Carbohydrate Interact to Potentiate Food Reward in Healthy Weight but Not in Overweight or Obesity
Source: PubMed Central journal article supplement (PMC8067354; doi:10.3390/nu13041203), 2021-04-06
Supplement: nutrients-13-01203-s001.pdf [file nutrients-13-01203-s001.pdf]

Article

# Fat and carbohydrate interact to potentiate food reward in healthy weight but not in overweight or obesity

## Supplementary Materials

**Table S1.** Descriptive statistics for subjective ratings and willingness to pay (WTP) for foods across the three macronutrient categories from participants with healthy weight (HW; n = 30).

| Subjective Variable<br>(Units or scale range) | Carbohydrate<br>M ± SD, Range | Fat<br>M ± SD, Range       | Combo<br>M ± SD, Range     |
|-----------------------------------------------|-------------------------------|----------------------------|----------------------------|
| Liking (-100 to +100%)                        | 18.6 ± 31.4, -100 to +100     | 17.3 ± 32.0, -100 to +83.0 | 20.3 ± 36.1, -100 to +89.3 |
| Familiarity (0-100%)                          | 86.0 ± 22.3, 0-100            | 79.7 ± 26.3, 0-100         | 83.5 ± 22.2, 0-100         |
| Frequency (days/month)                        | 2.40 ± 3.42, 0-15.04          | 2.83 ± 3.84, 0-20          | 2.31 ± 3.33, 0-15.29       |
| Expected satiety (0-100%)                     | 42.3 ± 26.0, 0-100            | 59.1 ± 19.4, 0-100         | 47.1 ± 23.0, 0-100         |
| Healthiness (0-100%)                          | 36.7 ± 24.3, 0-100            | 46.5 ± 20.0, 0-100         | 35.9 ± 22.3, 0-94.1        |
| Estimated energy content (kcal)               | 115 ± 50, 17-240              | 122 ± 45, 21-240           | 110 ± 46, 0-240            |
| Estimated energy density (0-100%)             | 49.0 ± 24.5, 0-100            | 66.8 ± 17.2, 0-100         | 55.7 ± 22.4, 0-100         |
| Estimated price (USD)                         | 1.34 ± 0.96, 0.07-5           | 1.57 ± 1.11, 0-5           | 1.29 ± 0.99, 0.06-5        |
| Willingness to pay (USD)                      | 0.94 ± 0.96, 0-4.92           | 0.98 ± 1.09, 0-5           | 1.04 ± 0.95, 0-4.55        |

**Table S2.** Descriptive statistics for subjective ratings and WTP for foods across the three macronutrient categories from participants with overweight/obesity (OW/OB; n = 30).

| Subjective Variable<br>(Units or scale range) | Carbohydrate<br>M ± SD, Range | Fat<br>M ± SD, Range       | Combo<br>M ± SD, Range     |
|-----------------------------------------------|-------------------------------|----------------------------|----------------------------|
| Liking (-100 to +100%)                        | 17.1 ± 32.4, -90.4 to +100    | 17.6 ± 31.0, -95.4 to +100 | 21.6 ± 30.4, -86.9 to +100 |
| Familiarity (0-100%)                          | 80.3 ± 24.0, 0-100            | 75.7 ± 28.0, 0-100         | 78.6 ± 24.6, 0-100         |
| Frequency (days/month)                        | 2.28 ± 3.57, 0-20             | 3.00 ± 4.12, 0-20          | 2.05 ± 2.82, 0-10.81       |
| Expected satiety (0-100%)                     | 43.5 ± 24.3, 0-100            | 55.8 ± 18.4, 0-100         | 43.5 ± 21.0, 0-94.9        |
| Healthiness (0-100%)                          | 37.4 ± 23.5, 0-94.6           | 48.3 ± 18.0, 0-100         | 35.9 ± 20.2, 0-81.4        |
| Estimated energy content (kcal)               | 128 ± 52, 18-240              | 121 ± 48, 0-240            | 122 ± 53, 0-240            |
| Estimated energy density (0-100%)             | 50.3 ± 22.0, 0-100            | 62.1 ± 14.6, 18.1-100      | 53.2 ± 30.9, 0-100         |
| Estimated price (USD)                         | 1.51 ± 0.99, 0.06-5           | 1.82 ± 1.10, 0.04-5        | 1.50 ± 0.97, 0.06-5        |
| Willingness to pay (USD)                      | 1.07 ± 0.98, 0-4.38           | 1.15 ± 1.07, 0-5           | 1.09 ± 0.98, 0-4.89        |

**Table S3.** Descriptive statistics and unpaired, two-sample t-tests on the Dietary Fat and Free Sugar Short Questionnaire (DFS) subscores and internal state ratings across BMI groups.

| DFS Score or Internal State<br>(Scale range) | HW<br>M ± SD, Range    | OW/OB<br>M ± SD, Range | BMI Group<br>Difference             |
|----------------------------------------------|------------------------|------------------------|-------------------------------------|
| DFS fat (0-55)                               | 28.1 ± 5.7, 19-43      | 28.7 ± 6.0, 19-46      | $t_{(1,58)} = 0.379$ , $p = 0.706$  |
| DFS sugar (0-45)                             | 18.7 ± 4.6, 11-29      | 18.2 ± 5.3, 9-32       | $t_{(1,58)} = -0.346$ , $p = 0.731$ |
| DFS fat-sugar (0-30)                         | 13.6 ± 3.3, 7-20       | 12.7 ± 3.2, 9-22       | $t_{(1,58)} = -1.143$ , $p = 0.258$ |
| Hunger (0-100%)                              | 71.5 ± 18.4, 0.1-97.4  | 67.1 ± 23.2, 0-99.4    | $t_{(1,58)} = -0.819$ , $p = 0.416$ |
| Fullness (0-100%)                            | 23.9 ± 20.9, 0-84.7    | 23.2 ± 19.5, 0-66.0    | $t_{(1,58)} = -0.122$ , $p = 0.903$ |
| Thirst (0-100%)                              | 69.4 ± 20.0, 25.4-100  | 73.2 ± 19.9, 20.0-100  | $t_{(1,58)} = 0.751$ , $p = 0.456$  |
| Desire to eat (0-100%)                       | 72.1 ± 17.3, 26.7-98.9 | 66.4 ± 18.4, 25.9-100  | $t_{(1,58)} = -1.241$ , $p = 0.220$ |

|                           |                       |                        |                                  |
|---------------------------|-----------------------|------------------------|----------------------------------|
| Potential to eat (0-100%) | 71.4 ± 16.5, 26.5-100 | 66.4 ± 14.3, 26.5-98.0 | $t_{(1,58)} = -1.257, p = 0.214$ |
|---------------------------|-----------------------|------------------------|----------------------------------|

**Table S4.** BMI group interactions in the regressions between WTP, actual energy density (AED), and estimated energy density (EED), tested on averages per food across participants with HW versus OW/OB.

| Variables                          | Foods Included     | BMI Group Interaction       |
|------------------------------------|--------------------|-----------------------------|
| <b>Outcome: WTP</b>                | All stimuli        | $\beta = 0.104, p = 0.627$  |
| <b>Predictors: AED × BMI Group</b> | Carbohydrate items | $\beta = -0.073, p = 0.858$ |
|                                    | Fat items          | $\beta = 0.159, p = 0.690$  |
|                                    | Combo items        | $\beta = 0.351, p = 0.262$  |
| <b>Outcome: WTP</b>                | All stimuli        | $\beta = 0.017, p = 0.511$  |
| <b>Predictors: EED × BMI Group</b> | Carbohydrate items | $\beta = 0.018, p = 0.736$  |
|                                    | Fat items          | $\beta = 0.011, p = 0.885$  |
|                                    | Combo items        | $\beta = 0.012, p = 0.838$  |
| <b>Outcome: AED</b>                | All stimuli        | $\beta = -0.018, p = 0.480$ |
| <b>Predictors: EED × BMI Group</b> | Carbohydrate items | $\beta = -0.006, p = 0.897$ |
|                                    | Fat items          | $\beta = -0.028, p = 0.748$ |
|                                    | Combo items        | $\beta = -0.061, p = 0.206$ |

**Table S5.** Correlations between actual energy density (AED) and characteristics and subjective ratings of foods in the combo category, tested on averages per food item across all participants.

| Variable                 | Correlation with AED       |
|--------------------------|----------------------------|
| Liking                   | $r^2 = 0.392, p = 0.029$   |
| Familiarity              | $r^2 = 0.002, p = 0.884$   |
| Frequency                | $r^2 = 0.327, p = 0.052$   |
| Healthiness              | $r^2 = 0.637, p = 0.002 *$ |
| Expected satiety         | $r^2 = 0.671, p = 0.001 *$ |
| Estimated energy content | $r^2 = 0.229, p = 0.115$   |
| Estimated energy density | $r^2 = 0.587, p = 0.004$   |
| Estimated price          | $r^2 = 0.835, p < 0.001 *$ |
| Actual price             | $r^2 = 0.859, p < 0.001 *$ |
| Volume                   | $r^2 = 0.703, p < 0.001 *$ |
| Visual area              | $r^2 = 0.052, p = 0.478$   |
| Fat content              | $r^2 = 0.062, p = 0.436$   |
| Carbohydrate content     | $r^2 = 0.067, p = 0.417$   |
| Protein content          | $r^2 = 0.343, p = 0.046$   |
| Sodium content           | $r^2 = 0.550, p = 0.006$   |

\*  $p < 0.0033$  after Bonferroni correction for the 15 correlations performed

**Table S6.** Testing if the relationships of food volume and expected satiety with actual energy density differ across pairwise comparisons of foods in the three macronutrient categories.

| Variables                                                                  | Pairwise Comparison       | Macronutrient Category Difference |
|----------------------------------------------------------------------------|---------------------------|-----------------------------------|
| <b>Outcome: AED</b><br><b>Predictors: Volume × Macronutrient</b>           | Carbohydrate versus Fat   | $t_{(1,20)} = 2.785, p = 0.011 *$ |
|                                                                            | Carbohydrate versus Combo | $t_{(1,20)} = 1.166, p = 0.257$   |
|                                                                            | Fat versus Combo          | $t_{(1,20)} = 1.229, p = 0.233$   |
| <b>Outcome: AED</b><br><b>Predictors: Expected Satiety × Macronutrient</b> | Carbohydrate versus Fat   | $t_{(1,20)} = 2.478, p = 0.022$   |
|                                                                            | Carbohydrate versus Combo | $t_{(1,20)} = 2.45, p = 0.024$    |
|                                                                            | Fat versus Combo          | $t_{(1,20)} = 2.211, p = 0.039$   |

\*  $p < 0.017$  after Bonferroni correction for the 3 pairwise comparisons per combination of outcome and predictor variables.

**Table S7.** Participant characteristics of the independent cohort for testing the modified picture set with varying food portions (N = 22).

| Characteristic (Units)               | Mean ± SD, Range                                                  |
|--------------------------------------|-------------------------------------------------------------------|
| Sex                                  | 6 Male, 16 Female                                                 |
| Age (yr)                             | 22.3 ± 6.6, 18-45                                                 |
| Education (yr)                       | 14.5 ± 2.5, 12-20                                                 |
| Race                                 | 12 White, 1 Black/African American, 8 Asian, 1 More than one race |
| Ethnicity                            | 2 Hispanic or Latino, 20 Not Hispanic or Latino                   |
| Household income <sup>1</sup>        | 5.2 ± 2.2, 1-8                                                    |
| Height (m)                           | 1.68 ± 0.07, 1.58-1.79                                            |
| Weight (kg)                          | 62.35 ± 7.61, 48.10-77.25                                         |
| Body mass index (kg/m <sup>2</sup> ) | 22.04 ± 1.72, 18.42-24.94                                         |
| Waist-hip ratio                      | 0.84 ± 0.07, 0.72-1.05                                            |
| Body fat (%)                         | 23.5 ± 7.1, 9.5-33.8                                              |

<sup>1</sup> Household income was dummy coded from 1-8 according to 2018 US Census Bureau income percentiles.

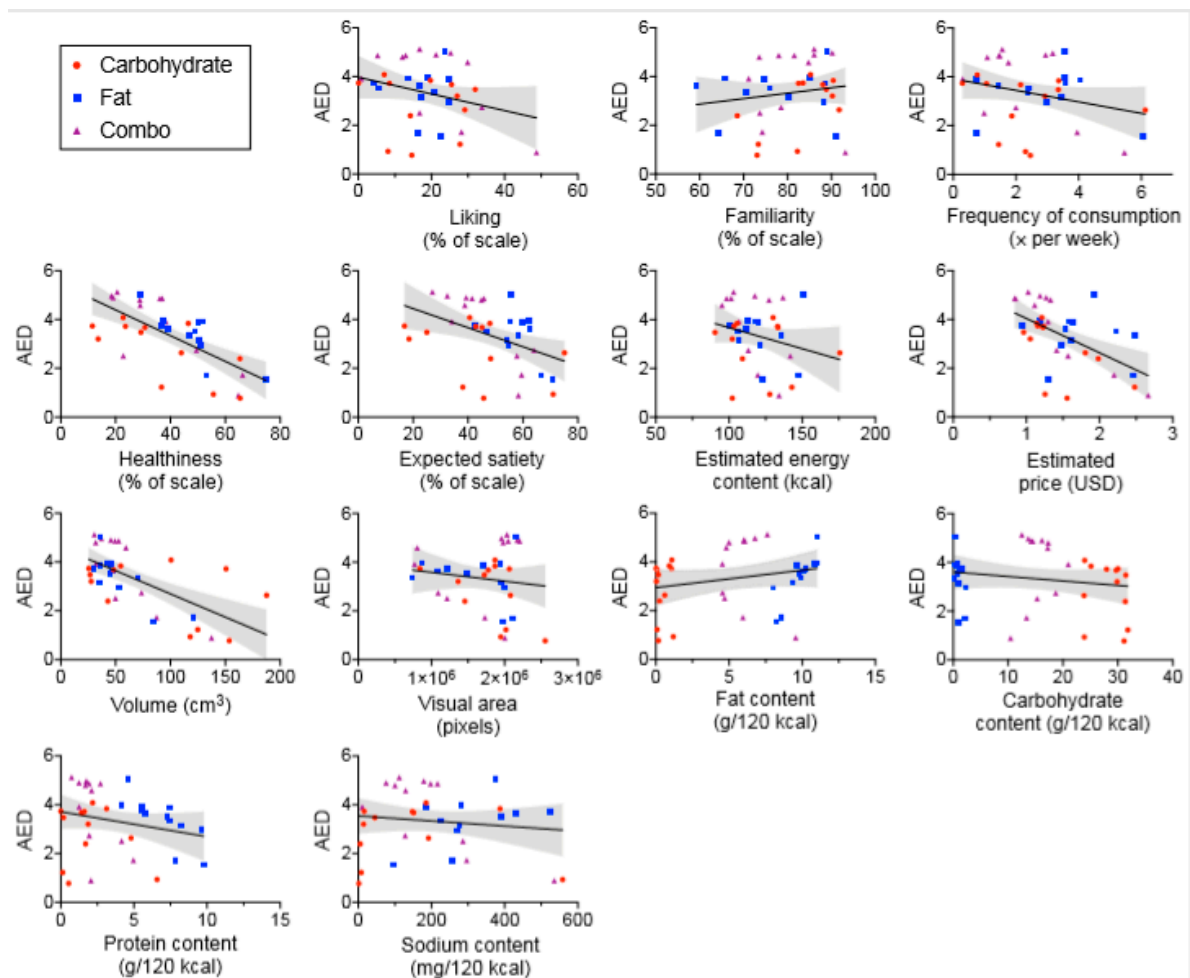

**Figure S1.** Fitted scatter plots comparing each food characteristic and subjective rating with actual energy density (AED, in g/120 kcal). Each data point represents a single food item from one of the three macronutrient categories (carbohydrate, fat, combo), with ratings averaged across all N = 60 participants (n = 30 HW and n = 30 OW/OB). Shading indicates 95% CI for the line of best fit.

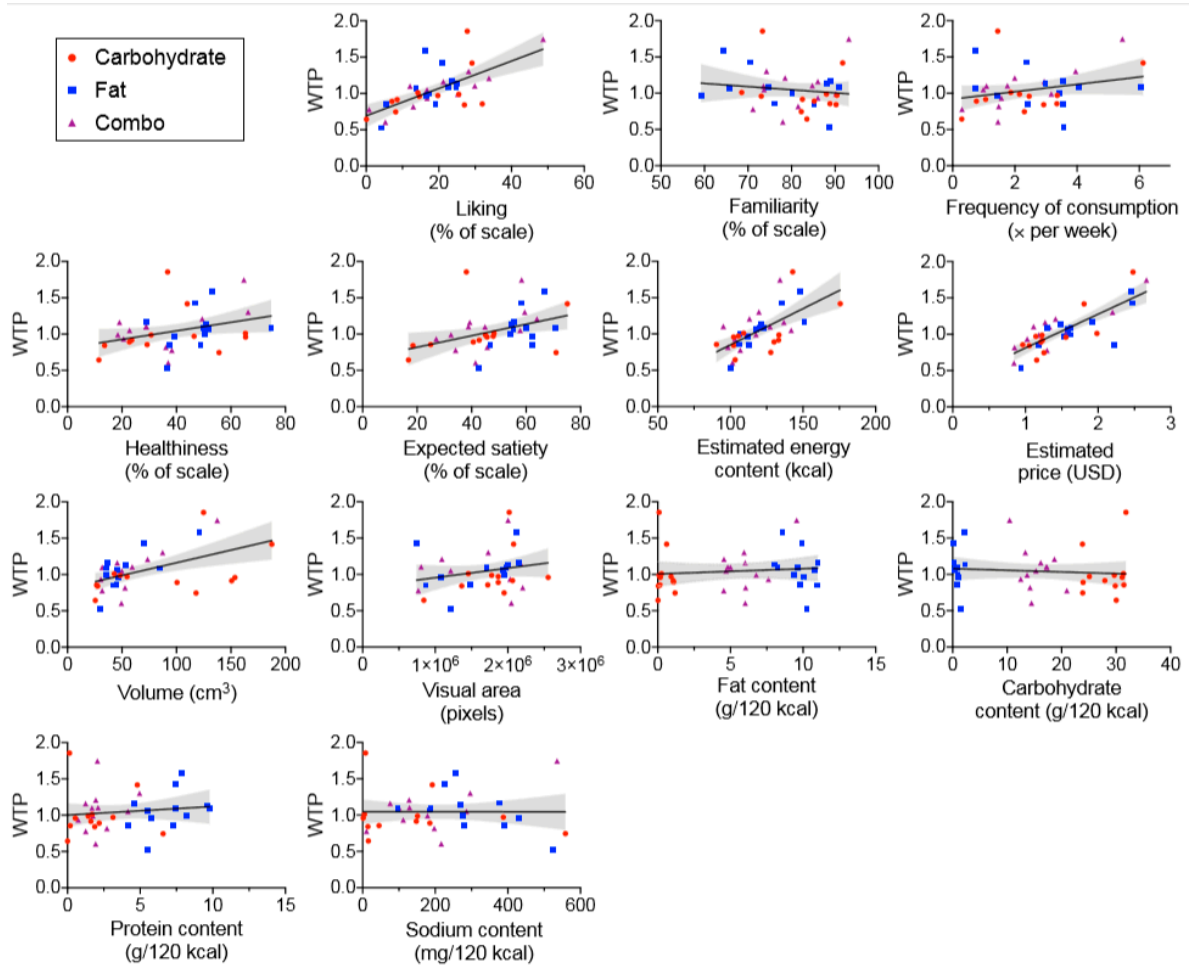

**Figure S2.** Fitted scatter plots comparing each food characteristic and subjective rating with willingness to pay (WTP, in USD). Each data point represents a single food item from one of the three macronutrient categories (carbohydrate, fat, combo), with ratings averaged across all  $N = 60$  participants ( $n = 30$  HW and  $n = 30$  OW/OB). Shading indicates 95% CI for the line of best fit.

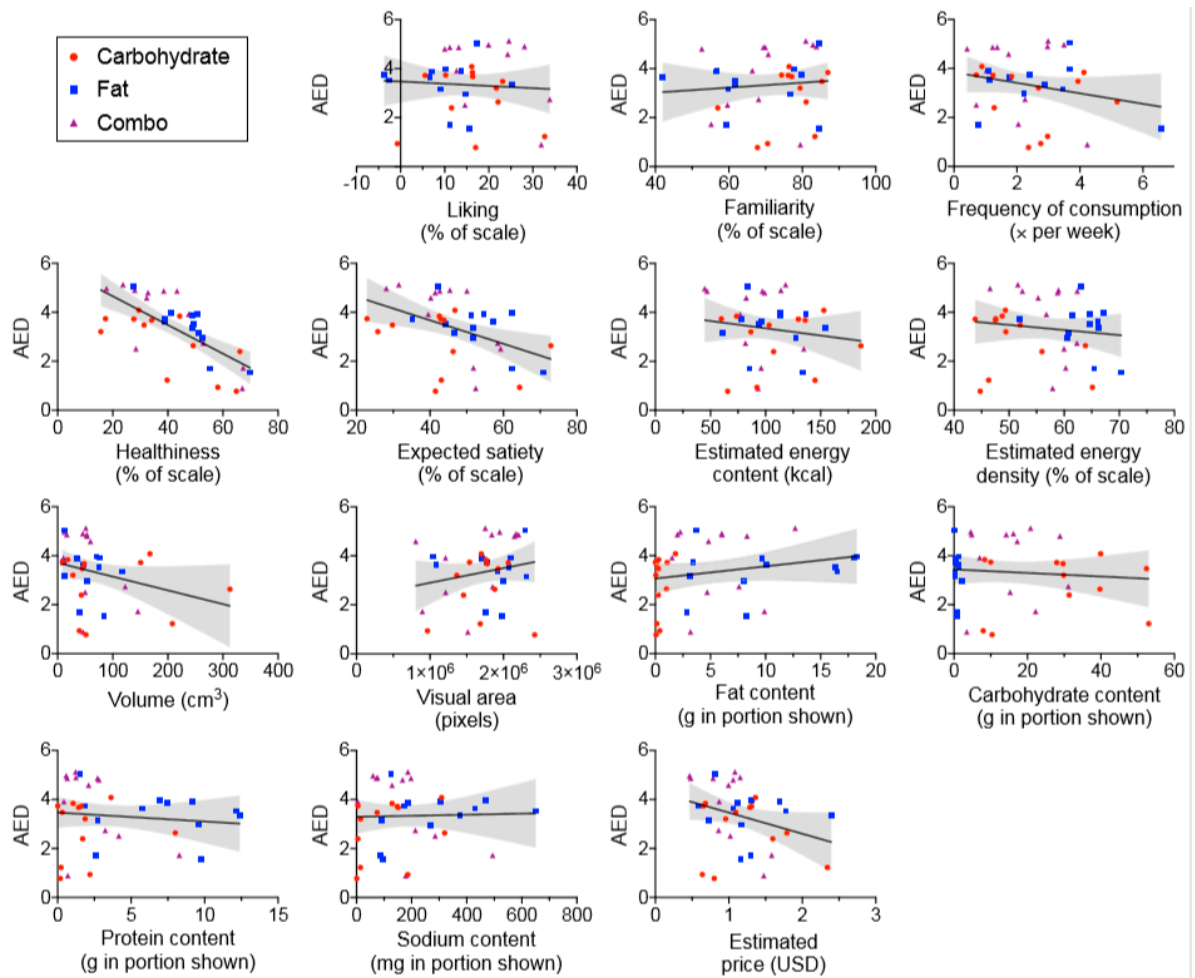

**Figure S3.** Fitted scatter plots comparing each characteristic and subjective rating with actual energy density (AED, in g/120 kcal) for foods pictured in varying portions (40, 120, 200 kcal). Each data point represents a single food item from one of the three macronutrient categories (carbohydrate, fat, combo), with ratings averaged across all N = 22 participants of the independent sample. Shading indicates 95% CI for the line of best fit.

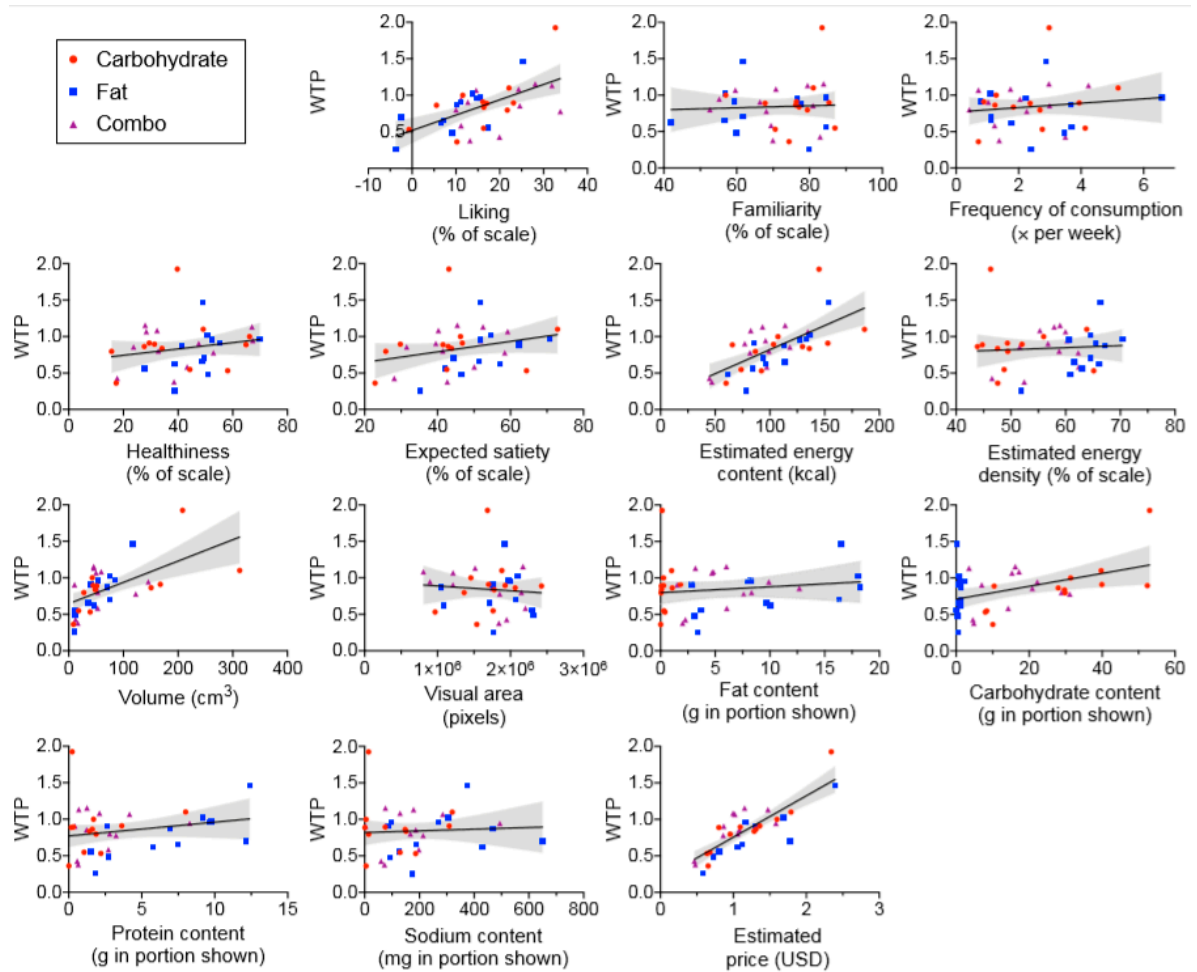

**Figure S4.** Fitted scatter plots comparing each characteristic and subjective rating with willingness to pay (WTP, in USD) for foods pictured in varying portions (40, 120, 200 kcal). Each data point represents a single food item from one of the three macronutrient categories (carbohydrate, fat, combo), with ratings averaged across all N = 22 participants of the independent sample. Shading indicates 95% CI for the line of best fit.
